# Supplementary material
Source: PubMed Central journal article supplement (PMC9044280)

## SUPPLEMENTAL MATERIAL

### Authors:

Daniel B. Mark, MD, MPH<sup>1</sup>; John A. Spertus, MD, MPH<sup>2</sup>; Robert Bigelow, PhD<sup>1</sup>; Sophia Anderson, MB<sup>1</sup>; Melanie R. Daniels, BA<sup>1</sup>; Kevin J. Anstrom, PhD<sup>1</sup>; Khaula N. Baloch, MPH<sup>1</sup>; David J. Cohen, MD, MSc<sup>3</sup>; Claes Held, MD<sup>4</sup>; Shaun G. Goodman, MD<sup>5</sup>, MSc; Sripal Bangalore, MD, MHA<sup>6</sup>; Derek Cyr, PhD<sup>1</sup>; Harmony R. Reynolds, MD<sup>6</sup>; Karen P. Alexander, MD<sup>1</sup>; Yves Rosenberg, MD, MPH<sup>7</sup>; Gregg W. Stone, MD<sup>8</sup>; David J. Maron, MD<sup>9</sup>; Judith S. Hochman, MD<sup>6</sup>; on behalf of the ISCHEMIA Research Group

### Affiliations:

<sup>1</sup>Duke Clinical Research Institute, Duke University, Durham, NC

<sup>2</sup>Saint Luke's Mid America Heart Institute/ University of Missouri - Kansas City, MO

<sup>3</sup>Cardiovascular Research Foundation, New York, NY, and St. Francis Hospital and Heart Center, Roslyn, NY

<sup>4</sup>Dept of Medical Sciences, Cardiology, Uppsala Clinical Research Center, Uppsala University, Uppsala, Sweden

<sup>5</sup>St. Michael's Hospital, University of Toronto, and Canadian Heart Research Centre, Toronto, Ontario, and Canadian VIGOUR Centre, University of Alberta, Edmonton, Alberta, Canada

<sup>6</sup>NYU Grossman School of Medicine, New York, NY

<sup>7</sup>National Heart, Lung, and Blood Institute, National Institutes of Health, Bethesda, MD

<sup>8</sup>The Zena and Michael A. Wiener Cardiovascular Institute, Icahn School of Medicine at Mount Sinai, New York, NY

<sup>9</sup>Department of Medicine, Stanford University School of Medicine, Stanford, CA

### Address for Correspondence:

Daniel B. Mark, MD, MPH  
Founding Director, Outcomes Research  
Duke Clinical Research Institute  
P.O. Box 17969, Durham, NC 27715  
300 W. Morgan Street, Durham, NC 27701  
daniel.mark@duke.edu  
919-668-8775 (Phone)

## **Supplement Section I:**

Quality of Life Instruments Collected in the ISCHEMIA Trial and Comprehensive QOL Substudy

## **Supplement Section II:**

Supplement Table 1: Baseline Characteristics in the ISCHEMIA Comprehensive QOL Substudy by Treatment Group, North American Patients\*

Supplement Table 2: Comparison of Baseline Characteristics of North American and International Patients in the ISCHEMIA Comprehensive QOL Substudy\*

Supplement Table 3: Baseline Characteristics in the ISCHEMIA Comprehensive QOL Substudy and the Portion of ISCHEMIA Patients Not Participating in the Comprehensive QOL Substudy

Supplement Table 4: Moderate to Severe Depression in the ISCHEMIA Comprehensive QOL Substudy

Supplement Table 5: Seattle Angina Questionnaire Outcomes in the ISCHEMIA Comprehensive QOL Substudy Stratified by Baseline Angina Frequency Score

- A) With Baseline Angina Frequency Score of 0 to 80
- B) With Baseline Angina Frequency Score of 81 to 100

Supplement Table 6: Secondary Quality of Life Instruments in the ISCHEMIA Comprehensive QOL Substudy Stratified by Baseline Angina Frequency Score

- A) With Baseline Angina Frequency Score of 0 to 80
- B) With Baseline Angina Frequency Score of 81 to 100

Supplement Figure 1. Treatment Differences in EQ-5D Visual Analog Scale Outcomes in the ISCHEMIA Comprehensive QOL Substudy

Supplement Figure 2: Treatment Differences in PHQ-8 Outcomes in the ISCHEMIA Comprehensive QOL Substudy

Supplement Figure 3: Treatment Differences in DASI Outcomes in the ISCHEMIA Comprehensive QOL Substudy, North America

Supplement Figure 4: Treatment Differences in PSS Outcomes in the ISCHEMIA Comprehensive QOL Substudy, North America

Supplement Figure 5: Treatment Differences LOT-R Outcomes in the ISCHEMIA Comprehensive QOL Substudy, North America

Supplement Figure 6: 12-Month Improvement in Seattle Angina Summary Scores in Patients with Mild, Moderate, and Severe QOL Impairment at Baseline in the ISCHEMIA Comprehensive QOL Substudy

Supplement Figure 7: 12-Month Improvement in SAQ Angina Frequency Scores in Patients with Mild, Moderate, and Severe Limitations at Baseline

Supplement Figure 8: 12-Month Improvement in Duke Activity Status Index Scores in Patients with Mild, Moderate, and Severe Limitations at Baseline in the ISCHEMIA Comprehensive QOL Substudy

## Supplement Section I: Quality of Life Instruments Collected in the ISCHEMIA Trial and Comprehensive QOL Substudy

| Assessment                                                                                                                                                                                                                          | Instruments                                                                                                                                                                                                                                      | Constructs Measured                                                                                                                                                                                  |
|-------------------------------------------------------------------------------------------------------------------------------------------------------------------------------------------------------------------------------------|--------------------------------------------------------------------------------------------------------------------------------------------------------------------------------------------------------------------------------------------------|------------------------------------------------------------------------------------------------------------------------------------------------------------------------------------------------------|
| Baseline Assessment                                                                                                                                                                                                                 | Seattle Angina Questionnaire (19-item)<br>Rose Dyspnea Scale<br>EQ-5D-3L<br>EQ-5D VAS<br>Duke Activity Status Index<br>RAND General Health rating<br>Patient Health Questionnaire-8<br>Perceived Stress Scale-4<br>Life Orientation Test-Revised | Angina-related health status<br>Dyspnea<br>General health status<br>General health status<br>Functional capacity<br>General health status<br>Depressive symptoms<br>Perception of stress<br>Optimism |
| Comprehensive Quality of Life Substudy<br>North America<br><br>(administered at 3, 12, 24, and 36 months following randomization, and at study close-out)<br><br>Collected by Duke Clinical Research Institute Outcomes Call Center | Seattle Angina Questionnaire (19-item)<br>Rose Dyspnea Scale<br>EQ-5D-3L<br>EQ-5D VAS<br>Duke Activity Status Index<br>RAND General Health rating<br>Patient Health Questionnaire-8<br>Perceived Stress Scale-4<br>Life Orientation Test-Revised | Angina-related health status<br>Dyspnea<br>General health status<br>General health status<br>Functional capacity<br>General health status<br>Depressive symptoms<br>Perception of stress<br>Optimism |
| Comprehensive Quality of Life Substudy<br>International<br><br>(administered at 3, 12, 24, and 36 months following randomization, and at study close-out)<br><br>Collected by site coordinators and recorded on the CRF             | Seattle Angina Questionnaire (19-item)<br>Rose Dyspnea Scale<br>EQ-5D-3L<br>EQ-5D VAS<br>Patient Health Questionnaire-8                                                                                                                          | Angina-related health status<br>Dyspnea<br>General health status<br>General health status<br>Depressive symptoms                                                                                     |
| Quality of Life Study<br>(administered at baseline and at 1.5, 3 and 6 months and then every 6 months thereafter until study termination)<br><br>Collected by site coordinators and recorded on the CRF                             | Seattle Angina Questionnaire-7 (7-item)<br>Rose Dyspnea Scale<br>EQ-5D VAS                                                                                                                                                                       | Angina-related health status<br>Dyspnea<br>General health status                                                                                                                                     |

### Quality of Life Instruments Collected in ISCHEMIA

#### *Seattle Angina Questionnaire-19*

The Seattle Angina Questionnaire (SAQ) is a validated 19-item CAD-specific health status instrument that assesses patients' function, symptoms, and quality of life over the past 4 weeks.<sup>1</sup> The SAQ quantifies five domains: Physical Limitation (9 items), Angina Stability (1 item), Angina Frequency (2 items), Treatment Satisfaction (4 items) and Quality of Life (3 items). Scores are calculated for each domain. In addition, a summary score is calculated that integrates the Physical Limitation, Angina Frequency, and Quality of Life scores. All scores are scaled 0-100 such that 0 represents the worst possible health status and 100 the

highest. For SAQ scales, 5 or more points represent a benchmark for a clinically significant change for an individual patient.<sup>1</sup>

SAQ Angina Frequency (AF) scores interpretive aids have been proposed: daily (SAQ AF score 0-30), weekly (scores of 31-60), monthly (scores of 61-99), and no angina over the past 4 weeks (SAQ AF scores = 100).<sup>2</sup> SAQ AF asks patients to provide a mental average assessment of events in the preceding 4 weeks, which may vary according to a number of factors (e.g. physical activity) and recall. Thus, terms used to describe SAQ AF score ranges, such as daily, weekly, monthly, or none should be understood to reflect descriptive approximations rather than precise categories.

#### *EQ-5D-3L*

The EuroQOL-5D (EQ-5D) is a commonly used assessment of generic health status consisting of two components. The first component is a descriptive system of five items that assesses different dimensions of health status (mobility, self-care, usual activities, pain/discomfort and anxiety/depression). The version used in ISCHEMIA (EQ-5D-3L) includes three response options for each item. Combinations of responses to these items define different possible health states, which are then mapped to country-specific preference weights, thus reflecting societal valuations of the health states. The second component is a visual analog scale (VAS) that assesses the patient's own valuation of their health, ranging from "best imaginable health state" (100) to "worst imaginable health state" (0).<sup>3</sup>

#### *Duke Activity Status Index*

The Duke Activity Status Index (DASI) is a validated 12-item questionnaire that assesses functional capacity in daily activities for patients with cardiovascular disease. Positive responses are weighted based on metabolic cost (MET) and summed to obtain a score ranging from 0 to 58.2; higher scores denote greater functional capacity.<sup>4</sup> A clinically meaningful change in the DASI is 4 points or more.<sup>5</sup>

#### *Patient Health Questionnaire-8*

The Patient Health Questionnaire-8 (PHQ-8) is an 8-item scale that assesses depressive symptoms.<sup>6</sup> A single integer summary score is calculated ranging from 0 to 24, with higher scores indicating greater severity of symptoms. A score of 10 or greater is considered major depression, 20 or more is severe major depression.

#### *RAND General Health Rating*

The RAND General Health rating is the first item from the RAND 36-Item Health Survey 1.0, which evaluates overall health on an ordinal 5-level scale.<sup>7</sup> Responses are scored 0 (poor) to 100 (excellent).

#### *Rose Dyspnea Scale*

The Rose Dyspnea Scale (RDS) consists of 4 items that assess activities of differing intensity that precipitate dyspnea symptoms.<sup>8</sup> Scores range from 0 to 4, where 0 indicates no dyspnea with activity and 4 indicates significant limitations due to dyspnea. The minimal clinically important difference for the RDS has not been formally established, although movement of 1 point has been proposed, given that there are only 5 possible values.

#### *Perceived Stress Scale-4*

The Perceived Stress Scale-4 (PSS-4) is a 4-item scale that assesses the degree to which the patient views situations in their life as stressful.<sup>9, 10</sup> A single integer summary score is calculated ranging from 0 to 16, with higher values denoting greater perceptions of stress.

#### *Life Orientation Test-Revised*

The Life Orientation Test-Revised (LOT-R) is a 10-item questionnaire that evaluates generalized optimism versus pessimism (4 of the 10 items are "filler" items that are not scored and were not included in the

assessments in ISCHEMIA).<sup>11</sup> A single integer summary score is calculated ranging from 0 to 24, with higher scores denoting greater optimism. Scores 0-13 indicate low optimism, 14-18 indicate moderate optimism, and 19-24 indicate high optimism.

## Supplement Section II: Supplemental Tables and Figures

Supplement Table 1: Baseline Characteristics in the ISCHEMIA Comprehensive QOL Substudy by Treatment Group, North American Patients\*

| Patient Characteristics                                                                                                                                                                                                                                        | Invasive Strategy (N=616) | Conservative Strategy (N=618) | p-value |
|----------------------------------------------------------------------------------------------------------------------------------------------------------------------------------------------------------------------------------------------------------------|---------------------------|-------------------------------|---------|
| Age at randomization - years                                                                                                                                                                                                                                   | 66.5 ± 8.8                | 66.0 ± 8.6                    | 0.24    |
| Male sex – no.(%)                                                                                                                                                                                                                                              | 501/616 (81.3%)           | 496/618 (80.3%)               | 0.63    |
| White race† – no./total no. (%)                                                                                                                                                                                                                                | 518/610 (84.9%)           | 493/608 (81.1%)               | 0.22    |
| Hypertension – no.(%)                                                                                                                                                                                                                                          | 504 (82.0%)               | 490 (79.3%)                   | 0.24    |
| Diabetes – no.(%)                                                                                                                                                                                                                                              | 266 (43.2%)               | 256 (41.4%)                   | 0.53    |
| Previous myocardial infarction – no.(%)                                                                                                                                                                                                                        | 120 (19.6%)               | 121 (19.7%)                   | 0.95    |
| New onset of angina over the past 3 months – no./total (%)                                                                                                                                                                                                     | 95/546 (17.4%)            | 99/552 (17.9%)                | 0.82    |
| Prior heart failure – no. (%)                                                                                                                                                                                                                                  | 26 (4.2%)                 | 23 (3.7%)                     | 0.65    |
| Prior cerebrovascular disease – no. (%)                                                                                                                                                                                                                        | 79 (12.9%)                | 72 (11.7%)                    | 0.52    |
| Prior peripheral vascular disease (PVD) – no. (%)                                                                                                                                                                                                              | 38 (6.2%)                 | 31 (5.0%)                     | 0.38    |
| Mean body mass index (kg/m <sup>2</sup> ) ‡                                                                                                                                                                                                                    | 30.7 ± 5.9                | 30.9 ± 6.3                    | 0.70    |
| Degree of ischemia on stress test, as assessed by core laboratory – no./total no. (%)                                                                                                                                                                          |                           |                               | 0.73    |
| None                                                                                                                                                                                                                                                           | 36/592 (6.1%)             | 28/594 (4.7%)                 |         |
| Mild                                                                                                                                                                                                                                                           | 43/592 (7.3%)             | 46/594 (7.7%)                 |         |
| Moderate                                                                                                                                                                                                                                                       | 276/592 (46.6%)           | 286/594 (48.1%)               |         |
| Severe                                                                                                                                                                                                                                                         | 237/592 (40.0%)           | 234/594 (39.4%)               |         |
| Baseline SAQ Summary Score§                                                                                                                                                                                                                                    | 78.2 ± 19.0               | 79.2 ± 19.5                   | 0.21    |
| Baseline SAQ Angina Frequency Score§                                                                                                                                                                                                                           | 84.6 ± 19.4               | 85.6 ± 18.5                   | 0.47    |
| Baseline Rose Dyspnea Scale Score¶                                                                                                                                                                                                                             | 1.2 ± 1.4                 | 1.2 ± 1.4                     | 0.80    |
| Baseline EQ-5D Visual Analog Scale                                                                                                                                                                                                                             | 70.0 ± 19.9               | 70.5 ± 20.1                   | 0.55    |
| *includes those who completed a baseline assessment and at least one follow-up assessment.                                                                                                                                                                     |                           |                               |         |
| † Race was reported by the participant.                                                                                                                                                                                                                        |                           |                               |         |
| ‡ Body-mass index (BMI) is the weight in kilograms divided by the square of the height in meters.                                                                                                                                                              |                           |                               |         |
| § On the Seattle Angina Questionnaire (SAQ), the Summary Score is obtained by averaging the SAQ Angina Frequency, SAQ Quality of Life, and SAQ Physical Limitation scores; SAQ scores range from 0 to 100, with higher scores indicating better health status. |                           |                               |         |
| ¶ On the Rose Dyspnea Scale, scores range from 0 to 4, with higher scores indicating dyspnea with milder activities.                                                                                                                                           |                           |                               |         |
| On the European Quality of Life – 5 Dimensions (EQ-5D) visual analogue scale, scores range from 0 to 100, with higher scores indicating better health status.                                                                                                  |                           |                               |         |

Supplement Table 2: Comparison of Baseline Characteristics of North American and International Patients in the ISCHEMIA Comprehensive QOL Substudy\*

| Patient Characteristics                                                               | North America QOL Population (N=1234) | International QOL Population (N=585) | P-value |
|---------------------------------------------------------------------------------------|---------------------------------------|--------------------------------------|---------|
| Age at randomization – year                                                           | 66.2 ± 8.7                            | 66.8 ± 8.8                           | 0.04    |
| Male sex – no.(%)                                                                     | 997 (80.8%)                           | 472 (80.7%)                          | 0.96    |
| White race† – no./total no. (%)                                                       | 1,011/1,218 (83.0%)                   | 505/584 (86.5%)                      | <.001   |
| Hypertension – no.(%)                                                                 | 994 (80.6%)                           | 433 (74.1%)                          | 0.002   |
| Diabetes – no.(%)                                                                     | 522 (42.3%)                           | 226 (38.6%)                          | 0.14    |
| Previous myocardial infarction – no.(%)                                               | 241 (19.6%)                           | 113 (19.3%)                          | 0.87    |
| New onset of angina over the past 3 months – no./total (%)                            | 194/1,098 (17.7%)                     | 121/565 (21.4%)                      | 0.07    |
| Prior heart failure – no. (%)                                                         | 49 (4.0%)                             | 18 (3.1%)                            | 0.34    |
| Prior cerebrovascular disease – no. (%)                                               | 151 (12.3%)                           | 40 (6.8%)                            | <.001   |
| Prior peripheral vascular disease – no. (%)                                           | 69 (5.6%)                             | 27 (4.6%)                            | 0.38    |
| Mean body mass index (kg/m <sup>2</sup> ) ‡                                           | 30.8 ± 6.1                            | 28.2 ± 4.2                           | <.01    |
| Degree of ischemia on stress test, as assessed by core laboratory – no./total no. (%) |                                       |                                      | <.001   |
| None                                                                                  | 64/1,186 (5.4%)                       | 21/524 (4.0%)                        |         |
| Mild                                                                                  | 89/1,186 (7.5%)                       | 29/524 (5.5%)                        |         |
| Moderate                                                                              | 562/1,186 (47.4%)                     | 191/524 (36.5%)                      |         |
| Severe                                                                                | 471/1,186 (39.7%)                     | 283/524 (54.0%)                      |         |
| Baseline SAQ Summary Score§                                                           | 78.7 ± 19.2                           | 78.5 ± 16.9                          | 0.15    |
| Baseline SAQ Angina Frequency Score§                                                  | 85.1 ± 18.9                           | 85.7 ± 16.6                          | 0.71    |
| Baseline Rose Dyspnea Scale Score¶                                                    | 1.2 ± 1.4                             | 0.9 ± 1.1                            | <.01    |
| Baseline EQ-5D Visual Analog Scale                                                    | 70.3 ± 20.0                           | 71.4 ± 39.3                          | 0.26    |

\*includes those who completed a baseline assessment and at least one follow-up assessment.

† Race was reported by the participant.

‡ Body-mass index (BMI) is the weight in kilograms divided by the square of the height in meters.

§ On the Seattle Angina Questionnaire (SAQ), the Summary Score is obtained by averaging the SAQ Angina Frequency, SAQ Quality of Life, and SAQ Physical Limitation scores.

¶ On the Rose Dyspnea Scale, scores range from 0 to 4, with higher scores indicating dyspnea with milder activities.

|| On the EQ-5D visual analogue scale, scores range from 0 to 100, with higher scores indicating better health status.

Supplement Table 3: Baseline Characteristics in the ISCHEMIA Comprehensive QOL Substudy and the Portion of ISCHEMIA Patients Not Participating in the Comprehensive QOL Substudy

| Descriptor                                                 | Overall<br>(N = 5179) | Patients in QoL<br>substudy<br>(N = 1819) | Remaining patients<br>(not in QoL substudy)<br>(N = 3360) | p-value |
|------------------------------------------------------------|-----------------------|-------------------------------------------|-----------------------------------------------------------|---------|
| <b>Demographics</b>                                        |                       |                                           |                                                           |         |
| Age at Randomization (yrs)                                 |                       |                                           |                                                           | <.001   |
| N                                                          | 5179                  | 1819                                      | 3360                                                      |         |
| Median (Q1, Q3)                                            | 64 (58, 70)           | 67 (61, 72)                               | 63 (56, 69)                                               |         |
| Sex                                                        |                       |                                           |                                                           | <.001   |
| Male                                                       | 4,011 / 5,179 (77.4%) | 1,469 / 1,819 (80.8%)                     | 2,542 / 3,360 (75.7%)                                     |         |
| Female                                                     | 1,168 / 5,179 (22.6%) | 350 / 1,819 (19.2%)                       | 818 / 3,360 (24.3%)                                       |         |
| Race                                                       |                       |                                           |                                                           | <.001   |
| American Indian or Alaskan Native                          | 13 / 5,129 (0.3%)     | 4 / 1,802 (0.2%)                          | 9 / 3,327 (0.3%)                                          |         |
| Asian                                                      | 1,485 / 5,129 (29.0%) | 135 / 1,802 (7.5%)                        | 1,350 / 3,327 (40.6%)                                     |         |
| Native Hawaiian or Other Pacific Islander                  | 12 / 5,129 (0.2%)     | 9 / 1,802 (0.5%)                          | 3 / 3,327 (0.1%)                                          |         |
| Black or African American                                  | 204 / 5,129 (4.0%)    | 132 / 1,802 (7.3%)                        | 72 / 3,327 (2.2%)                                         |         |
| White                                                      | 3,403 / 5,129 (66.3%) | 1,516 / 1,802 (84.1%)                     | 1,887 / 3,327 (56.7%)                                     |         |
| Multiple Races Reported                                    | 12 / 5,129 (0.2%)     | 6 / 1,802 (0.3%)                          | 6 / 3,327 (0.2%)                                          |         |
| Ethnicity                                                  |                       |                                           |                                                           | 0.002   |
| Hispanic or Latino                                         | 763 / 4,815 (15.8%)   | 310 / 1,717 (18.1%)                       | 453 / 3,098 (14.6%)                                       |         |
| Not Hispanic or Latino                                     | 4,052 / 4,815 (84.2%) | 1,407 / 1,717 (81.9%)                     | 2,645 / 3,098 (85.4%)                                     |         |
| <b>Clinical History</b>                                    |                       |                                           |                                                           |         |
| Hypertension                                               | 3,789 / 5,161 (73.4%) | 1,427 / 1,817 (78.5%)                     | 2,362 / 3,344 (70.6%)                                     | <.001   |
| Diabetes                                                   | 2,164 / 5,179 (41.8%) | 748 / 1,819 (41.1%)                       | 1,416 / 3,360 (42.1%)                                     | 0.477   |
| Prior MI                                                   | 991 / 5,162 (19.2%)   | 354 / 1,812 (19.5%)                       | 637 / 3,350 (19.0%)                                       | 0.650   |
| Prior PCI                                                  | 1,050 / 5,175 (20.3%) | 463 / 1,816 (25.5%)                       | 587 / 3,359 (17.5%)                                       | <.001   |
| Prior CABG                                                 | 203 / 5,179 (3.9%)    | 98 / 1,819 (5.4%)                         | 105 / 3,360 (3.1%)                                        | <.001   |
| Atrial fibrillation/atrial flutter                         | 221 / 5,173 (4.3%)    | 100 / 1,818 (5.5%)                        | 121 / 3,355 (3.6%)                                        | 0.001   |
| <b>Non-Cardiac Vascular and Comorbidity History</b>        |                       |                                           |                                                           |         |
| Prior transient ischemia attack                            | 114 / 5,165 (2.2%)    | 68 / 1,814 (3.7%)                         | 46 / 3,351 (1.4%)                                         | <.001   |
| Prior Stroke                                               | 151 / 5,178 (2.9%)    | 74 / 1,819 (4.1%)                         | 77 / 3,359 (2.3%)                                         | <.001   |
| Prior cerebrovascular disease or peripheral artery disease | 542 / 5,159 (10.5%)   | 265 / 1,810 (14.6%)                       | 277 / 3,349 (8.3%)                                        | <.001   |
| Prior TIA, prior stroke, or prior PAD                      | 542 / 5,179 (10.5%)   | 265 / 1,819 (14.6%)                       | 277 / 3,360 (8.2%)                                        | <.001   |
| <b>Qualifying Stress Test Core Lab Interpretation</b>      |                       |                                           |                                                           |         |
| Ischemia Severity by Imaging Modality                      |                       |                                           |                                                           |         |



| Descriptor                                                        | Overall<br>(N = 5179) | Patients in QoL<br>substudy<br>(N = 1819) | Remaining patients<br>(not in QoL substudy)<br>(N = 3360) | p-value |
|-------------------------------------------------------------------|-----------------------|-------------------------------------------|-----------------------------------------------------------|---------|
| Stress Imaging Overall<br>(severity)                              |                       |                                           |                                                           | <.001   |
| Severe                                                            | 2,797 / 5,105 (54.8%) | 826 / 1,812 (45.6%)                       | 1,971 / 3,293 (59.9%)                                     |         |
| Moderate                                                          | 1,702 / 5,105 (33.3%) | 772 / 1,812 (42.6%)                       | 930 / 3,293 (28.2%)                                       |         |
| Mild                                                              | 352 / 5,105 (6.9%)    | 124 / 1,812 (6.8%)                        | 228 / 3,293 (6.9%)                                        |         |
| None                                                              | 254 / 5,105 (5.0%)    | 90 / 1,812 (5.0%)                         | 164 / 3,293 (5.0%)                                        |         |
| Exercise Tolerance Test<br>(ETT)                                  |                       |                                           |                                                           | <.001   |
| Severe                                                            | 1,051 / 1,214 (86.6%) | 72 / 102 (70.6%)                          | 979 / 1,112 (88.0%)                                       |         |
| Moderate                                                          | 101 / 1,214 (8.3%)    | 19 / 102 (18.6%)                          | 82 / 1,112 (7.4%)                                         |         |
| Mild                                                              | 34 / 1,214 (2.8%)     | 6 / 102 (5.9%)                            | 28 / 1,112 (2.5%)                                         |         |
| None                                                              | 28 / 1,214 (2.3%)     | 5 / 102 (4.9%)                            | 23 / 1,112 (2.1%)                                         |         |
| <b>CCTA Findings</b>                                              |                       |                                           |                                                           |         |
| Any Obstructive Disease<br>>=50% Stenosis by CCTA                 | 3,832 / 3,905 (98.1%) | 1,489 / 1,521 (97.9%)                     | 2,343 / 2,384 (98.3%)                                     | 0.388   |
| Multi-vessel disease >=50%<br>stenosis by CCTA                    | 2,679 / 3,909 (68.5%) | 1,040 / 1,521 (68.4%)                     | 1,639 / 2,388 (68.6%)                                     | 0.978   |
| Vessels >=50% stenosis by<br>CCTA                                 |                       |                                           |                                                           | 0.229   |
| 1                                                                 | 697 / 3,905 (17.8%)   | 270 / 1,521 (17.8%)                       | 427 / 2,384 (17.9%)                                       |         |
| 2                                                                 | 938 / 3,905 (24.0%)   | 380 / 1,521 (25.0%)                       | 558 / 2,384 (23.4%)                                       |         |
| 3+                                                                | 1,347 / 3,905 (34.5%) | 497 / 1,521 (32.7%)                       | 850 / 2,384 (35.7%)                                       |         |
| <b>Angina and Heart Failure History</b>                           |                       |                                           |                                                           |         |
| Participant has ever had<br>angina                                | 4,641 / 5,179 (89.6%) | 1,500 / 1,819 (82.5%)                     | 3,141 / 3,360 (93.5%)                                     | <.001   |
| Angina over the past month                                        |                       |                                           |                                                           | <.001   |
| None                                                              | 1,035 / 5,177 (20.0%) | 557 / 1,818 (30.6%)                       | 478 / 3,359 (14.2%)                                       |         |
| I                                                                 | 1,389 / 5,177 (26.8%) | 563 / 1,818 (31.0%)                       | 826 / 3,359 (24.6%)                                       |         |
| II                                                                | 2,522 / 5,177 (48.7%) | 634 / 1,818 (34.9%)                       | 1,888 / 3,359 (56.2%)                                     |         |
| III                                                               | 230 / 5,177 (4.4%)    | 63 / 1,818 (3.5%)                         | 167 / 3,359 (5.0%)                                        |         |
| IV                                                                | 1 / 5,177 (0.0%)      | 1 / 1,818 (0.1%)                          | 0 / 3,359 (0.0%)                                          |         |
| New Onset of Angina Over<br>the Past 3 Months                     | 855 / 4,918 (17.4%)   | 315 / 1,663 (18.9%)                       | 540 / 3,255 (16.6%)                                       | 0.040   |
| Angina began or became<br>more frequent over the past 3<br>months | 1,355 / 5,167 (26.2%) | 566 / 1,807 (31.3%)                       | 789 / 3,360 (23.5%)                                       | <.001   |
| Prior Heart Failure                                               | 206 / 5,179 (4.0%)    | 67 / 1,819 (3.7%)                         | 139 / 3,360 (4.1%)                                        | 0.425   |
| Continuous ejection fraction<br>(%)                               |                       |                                           |                                                           | <.001   |
| N                                                                 | 4637                  | 1687                                      | 2950                                                      |         |

| Descriptor                       | Overall<br>(N = 5179) | Patients in QoL<br>substudy<br>(N = 1819) | Remaining patients<br>(not in QoL substudy)<br>(N = 3360) | p-value |
|----------------------------------|-----------------------|-------------------------------------------|-----------------------------------------------------------|---------|
| Median (Q1, Q3)                  | 60 (55, 65)           | 60 (55, 65)                               | 60 (55, 65)                                               |         |
| Ejection fraction at peak stress |                       |                                           |                                                           | 0.087   |
| N                                | 3077                  | 1527                                      | 1550                                                      |         |
| Median (Q1, Q3)                  | 58 (51, 65)           | 57 (51, 65)                               | 58 (51, 65)                                               |         |
| NYHA CLASS                       |                       |                                           |                                                           | 0.056   |
| None                             | 3,163 / 5,179 (61.1%) | 1,092 / 1,819 (60.0%)                     | 2,071 / 3,360 (61.6%)                                     |         |
| NYHA Class I                     | 999 / 5,179 (19.3%)   | 441 / 1,819 (24.2%)                       | 558 / 3,360 (16.6%)                                       |         |
| NYHA Class II                    | 1,017 / 5,179 (19.6%) | 286 / 1,819 (15.7%)                       | 731 / 3,360 (21.8%)                                       |         |
| Baseline angina frequency        |                       |                                           |                                                           | 0.865   |
| Daily (score 0-30)               | 38 / 1,869 (2.0%)     | 37 / 1,815 (2.0%)                         | 1 / 54 (1.9%)                                             |         |
| Weekly (score 31-60)             | 253 / 1,869 (13.5%)   | 250 / 1,815 (13.8%)                       | 3 / 54 (5.6%)                                             |         |
| Monthly (score 61-99)            | 728 / 1,869 (39.0%)   | 699 / 1,815 (38.5%)                       | 29 / 54 (53.7%)                                           |         |
| None (score = 100)               | 850 / 1,869 (45.5%)   | 829 / 1,815 (45.7%)                       | 21 / 54 (38.9%)                                           |         |

CCS=Canadian Cardiovascular Society, CABG=coronary artery bypass grafting surgery, CCTA=coronary computed tomography angiography, NYHA=New York Heart Association, N=number, PAD=peripheral artery disease, PCI=percutaneous coronary intervention, Q1=quartile 1, Q2=quartile 2, TIA=transient ischemic attack

Supplement Table 4: Moderate to Severe Depression in the ISCHEMIA Comprehensive QOL Substudy

| <b>PHQ-8</b>                                          | <b>Invasive Strategy<br/>(N=907)</b> | <b>Conservative Strategy<br/>(N=912)</b> | <b>P-value</b> |
|-------------------------------------------------------|--------------------------------------|------------------------------------------|----------------|
| PHQ-8 Score $\geq 10$ = Moderate to Severe Depression |                                      |                                          |                |
| <b>Baseline</b>                                       |                                      |                                          |                |
| Number of patients with a complete PHQ-8 score        | 847                                  | 842                                      |                |
| Patients with moderate to severe depression           | 97 (11.5)                            | 108 (12.8)                               | 0.39           |
| <b>3 month</b>                                        |                                      |                                          |                |
| Number of patients with a complete PHQ-8 score        | 777                                  | 778                                      |                |
| Patients with moderate to severe depression           | 72 (9.3%)                            | 59 (7.6%)                                | 0.23           |
| <b>12 month</b>                                       |                                      |                                          |                |
| Number of patients with a complete PHQ-8 score        | 764                                  | 756                                      |                |
| Patients with moderate to severe depression           | 69 (9.0%)                            | 59 (7.8%)                                | 0.39           |
| <b>24 month</b>                                       |                                      |                                          |                |
| Number of patients with a complete PHQ-8 score        | 565                                  | 558                                      |                |
| Patients with moderate to severe depression           | 43 (7.6%)                            | 57 (10.2%)                               | 0.13           |
| <b>36 month</b>                                       |                                      |                                          |                |
| Number of patients with a complete PHQ-8 score        | 386                                  | 385                                      |                |
| Patients with moderate to severe depression           | 38 (9.8%)                            | 37 (9.6%)                                | 0.91           |
| <b>Close-out</b>                                      |                                      |                                          |                |
| Number of patients with a complete PHQ-8 score        | 555                                  | 452                                      |                |
| Patients with moderate to severe depression           | 45 (8.1%)                            | 42 (7.3%)                                | 0.63           |

Supplement Table 5: Seattle Angina Questionnaire Outcomes in the ISCHEMIA Comprehensive QOL Substudy Stratified by Baseline Angina Frequency Score

A) With Baseline Angina Frequency Score of 0 to 80

|                                                                | Invasive Strategy |             |       | Conservative Strategy |             |       | Adjusted Difference (95% CI) |
|----------------------------------------------------------------|-------------------|-------------|-------|-----------------------|-------------|-------|------------------------------|
|                                                                | Median [q1 q3]    | Mean (SD)   | N 372 | Median [q1 q3]        | Mean (SD)   | N 372 |                              |
| <b>SAQ Summary Score</b>                                       |                   |             |       |                       |             |       |                              |
| Scale: 0 to100; higher scores indicating greater health status |                   |             |       |                       |             |       |                              |
| Baseline                                                       | 65 [54, 73]       | 62.6 (14.4) | 372   | 63 [53, 74]           | 62.0 (15.4) | 372   | 0.7 (-1.5, 2.8)              |
| 3 month                                                        | 89 [70, 96]       | 81.7 (18.6) | 355   | 79 [65, 89]           | 75.2 (18.4) | 353   | 6.5 (3.7, 9.2)               |
| 12 month                                                       | 90 [77, 97]       | 84.3 (17.3) | 348   | 84 [70, 93]           | 79.7 (16.9) | 336   | 4.7 (2.2, 7.2)               |
| 24 month                                                       | 91 [79, 97]       | 85.4 (15.7) | 255   | 86 [74, 94]           | 81.9 (16.8) | 247   | 3.4 (0.8, 6.1)               |
| 36 month                                                       | 92 [81, 97]       | 85.1 (17.8) | 172   | 87 [76, 94]           | 82.7 (16.4) | 169   | 1.7 (-1.4, 4.8)              |
| Close-out                                                      | 92 [80, 97]       | 85.8 (16.8) | 250   | 87 [76, 95]           | 83.1 (16.1) | 257   | 2.2 (-0.5, 4.9)              |
| All follow-up                                                  | 91 [78, 97]       | 84.2 (17.4) | 1380  | 84 [71, 94]           | 79.9 (17.3) | 1362  | 3.7 (1.6, 5.8)               |
| <b>SAQ Physical Limitation Score</b>                           |                   |             |       |                       |             |       |                              |
| Scale: 0 to100; higher scores indicating greater health status |                   |             |       |                       |             |       |                              |
| Baseline                                                       | 72 [53, 86]       | 68.8 (21.4) | 345   | 69 [53, 86]           | 68.4 (22.0) | 349   | 0.4 (-2.9, 3.6)              |
| 3 month                                                        | 92 [67, 100]      | 81.3 (23.2) | 307   | 85 [64, 97]           | 78.6 (22.3) | 303   | 3.3 (-0.2, 6.8)              |
| 12 month                                                       | 94 [75, 100]      | 84.8 (21.1) | 310   | 89 [69, 100]          | 81.0 (22.2) | 298   | 4.1 (0.8, 7.5)               |
| 24 month                                                       | 96 [72, 100]      | 84.3 (21.2) | 229   | 92 [69, 100]          | 81.5 (21.9) | 218   | 2.9 (-0.8, 6.6)              |
| 36 month                                                       | 94 [79, 100]      | 83.3 (24.1) | 153   | 86 [72, 100]          | 79.7 (24.0) | 150   | 2.4 (-2.1, 6.9)              |
| Close-out                                                      | 97 [81, 100]      | 85.4 (22.3) | 219   | 92 [72, 100]          | 82.1 (22.4) | 222   | 3.2 (-0.6, 7.0)              |
| All follow-up                                                  | 94 [75, 100]      | 83.7 (22.3) | 1218  | 89 [69, 100]          | 80.5 (22.5) | 1191  | 3.2 (0.2, 6.1)               |
| <b>SAQ Angina Frequency Score</b>                              |                   |             |       |                       |             |       |                              |
| Scale: 0 to100; higher scores indicating greater health status |                   |             |       |                       |             |       |                              |
| Baseline                                                       | 70 [60, 80]       | 65.9 (15.5) | 372   | 70 [60, 80]           | 66.3 (15.1) | 372   | -0.4 (-2.6, 1.8)             |
| 3 month                                                        | 100 [80, 100]     | 87.3 (18.8) | 354   | 90 [70, 100]          | 81.4 (20.6) | 353   | 6.1 (3.2, 9.0)               |
| 12 month                                                       | 100 [80, 100]     | 89.1 (17.4) | 346   | 90 [80, 100]          | 85.4 (18.1) | 336   | 3.8 (1.1, 6.4)               |
| 24 month                                                       | 100 [90, 100]     | 90.9 (16.4) | 255   | 100 [80, 100]         | 88.3 (16.9) | 246   | 2.4 (-0.4, 5.2)              |
| 36 month                                                       | 100 [90, 100]     | 91.9 (16.5) | 171   | 100 [80, 100]         | 89.3 (16.6) | 169   | 1.7 (-1.5, 5.0)              |
| Close-out                                                      | 100 [80, 100]     | 90.7 (15.9) | 250   | 100 [80, 100]         | 88.4 (17.8) | 256   | 1.8 (-1.1, 4.7)              |
| All follow-up                                                  | 100 [80, 100]     | 89.6 (17.3) | 1376  | 90 [80, 100]          | 85.9 (18.6) | 1360  | 3.2 (1.2, 5.1)               |
| <b>SAQ Quality of Life Score</b>                               |                   |             |       |                       |             |       |                              |
| Scale: 0 to100; higher scores indicating greater health status |                   |             |       |                       |             |       |                              |
| Baseline                                                       | 50 [42, 67]       | 53.5 (19.8) | 372   | 50 [38, 67]           | 51.9 (22.2) | 370   | 1.6 (-1.4, 4.6)              |
| 3 month                                                        | 83 [67, 92]       | 76.1 (22.6) | 352   | 67 [50, 83]           | 66.4 (22.8) | 351   | 9.6 (6.3, 12.9)              |
| 12 month                                                       | 83 [67, 96]       | 78.8 (21.2) | 340   | 75 [58, 92]           | 72.6 (21.8) | 332   | 6.3 (3.1, 9.5)               |
| 24 month                                                       | 83 [67, 92]       | 81.0 (18.8) | 254   | 83 [67, 92]           | 75.5 (21.7) | 244   | 5.7 (2.3, 9.1)               |
| 36 month                                                       | 83 [67, 100]      | 80.1 (21.6) | 171   | 83 [67, 92]           | 77.7 (20.9) | 161   | 3.2 (-0.9, 7.3)              |
| Close-out                                                      | 92 [67, 100]      | 81.3 (19.9) | 243   | 83 [67, 92]           | 78.8 (19.0) | 244   | 1.8 (-1.5, 5.1)              |
| All follow-up                                                  | 83 [67, 92]       | 79.1 (21.0) | 1360  | 75 [58, 92]           | 73.2 (21.9) | 1332  | 5.3 (2.8, 7.8)               |
| <b>SAQ Treatment Satisfaction</b>                              |                   |             |       |                       |             |       |                              |
| Scale: 0 to100; higher scores indicating greater health status |                   |             |       |                       |             |       |                              |

|               |               |             |      |               |             |      |                  |
|---------------|---------------|-------------|------|---------------|-------------|------|------------------|
| Baseline      | 81 [75, 100]  | 82.8 (15.8) | 364  | 81 [69, 100]  | 81.8 (17.7) | 360  | 0.9 (-1.5, 3.3)  |
| 3 month       | 100 [81, 100] | 90.3 (13.1) | 333  | 88 [81, 100]  | 86.8 (15.4) | 329  | 3.2 (-1.1, 5.4)  |
| 12 month      | 100 [81, 100] | 91.4 (12.8) | 332  | 94 [81, 100]  | 87.3 (16.1) | 325  | 4.1 (-1.9, 6.3)  |
| 24 month      | 100 [84, 100] | 91.9 (12.2) | 248  | 97 [81, 100]  | 89.1 (14.8) | 236  | 3.1 (0.8, 5.4)   |
| 36 month      | 100 [88, 100] | 91.6 (14.2) | 170  | 100 [81, 100] | 91.1 (13.0) | 162  | 0.1 (-2.7, 2.8)  |
| Close-out     | 100 [88, 100] | 91.1 (16.3) | 241  | 100 [81, 100] | 90.8 (13.7) | 244  | -0.2 (-2.8, 2.3) |
| All follow-up | 100 [81, 100] | 91.2 (13.6) | 1324 | 94 [81, 100]  | 88.6 (15.0) | 1296 | 2.0 (0.4, 3.7)   |

B) With Baseline Angina Frequency Score of 81 to 100

|                                                                | Invasive Strategy |             |       | Conservative Strategy |             |       | Adjusted Difference (95% CI) |
|----------------------------------------------------------------|-------------------|-------------|-------|-----------------------|-------------|-------|------------------------------|
|                                                                | Median [q1 q3]    | Mean (SD)   | N 533 | Median [q1 q3]        | Mean (SD)   | N 538 |                              |
| <b>SAQ Summary Score</b>                                       |                   |             |       |                       |             |       |                              |
| Scale: 0 to100; higher scores indicating greater health status |                   |             |       |                       |             |       |                              |
| Baseline                                                       | 87 [79, 94]       | 85.3 (11.4) | 533   | 89 [81, 94]           | 87.1 (9.9)  | 538   | -1.9 (-3.2, -0.6)            |
| 3 month                                                        | 92 [83, 97]       | 87.7 (13.6) | 506   | 92 [84, 97]           | 88.8 (11.3) | 505   | -1.2 (-2.7, 0.3)             |
| 12 month                                                       | 94 [86, 99]       | 90.6 (11.0) | 483   | 94 [85, 97]           | 90.0 (11.5) | 487   | 0.7 (-0.7, 2.1)              |
| 24 month                                                       | 94 [88, 100]      | 91.0 (11.4) | 359   | 94 [86, 97]           | 90.5 (11.1) | 353   | 0.5 (-1.1, 2.0)              |
| 36 month                                                       | 94 [83, 100]      | 89.9 (12.0) | 239   | 95 [89, 98]           | 90.9 (12.0) | 241   | -0.7 (-2.7, 1.2)             |
| Close-out                                                      | 94 [86, 99]       | 90.4 (11.3) | 353   | 94 [87, 97]           | 90.7 (11.2) | 360   | -0.3 (-1.9, 1.3)             |
| All follow-up                                                  | 94[85, 98]        | 89.8 (12.0) | 1940  | 94 [86, 97]           | 90.0 (11.4) | 1946  | -0.2 (-1.4, 0.9)             |
| <b>SAQ Physical Limitation Score</b>                           |                   |             |       |                       |             |       |                              |
| Scale: 0 to100; higher scores indicating greater health status |                   |             |       |                       |             |       |                              |
| Baseline                                                       | 89 [75, 100]      | 83.3 (19.2) | 481   | 89 [78, 100]          | 85.0 (17.1) | 486   | -1.7 (-4.0, 0.6)             |
| 3 month                                                        | 100 [83, 100]     | 87.7 (19.3) | 439   | 97 [82, 100]          | 88.7 (16.5) | 446   | -1.0 (-3.3, 1.3)             |
| 12 month                                                       | 100 [83, 100]     | 89.7 (17.1) | 426   | 100 [86, 100]         | 90.1 (16.2) | 432   | -0.4 (-2.6, 1.8)             |
| 24 month                                                       | 100 [88, 100]     | 90.4 (16.6) | 308   | 100 [85, 100]         | 89.5 (17.3) | 316   | 0.4 (-2.1, 2.9)              |
| 36 month                                                       | 100 [79, 100]     | 86.2 (20.7) | 210   | 97 [83, 100]          | 88.4 (18.8) | 213   | -1.3 (-4.7, 2.0)             |
| Close-out                                                      | 100 [83, 100]     | 89.9 (16.8) | 312   | 100 [86, 100]         | 90.6 (15.4) | 320   | -0.6 (-3.0, 1.9)             |
| All follow-up                                                  | 100 [83, 100]     | 88.9 (18.1) | 1695  | 100 [83, 100]         | 89.5 (16.7) | 1727  | -0.6 (-2.5, 1.3)             |
| <b>SAQ Angina Frequency Score</b>                              |                   |             |       |                       |             |       |                              |
| Scale: 0 to100; higher scores indicating greater health status |                   |             |       |                       |             |       |                              |
| Baseline                                                       | 100 [100, 100]    | 97.6 (4.3)  | 533   | 100 [100, 100]        | 97.9 (4.1)  | 538   | -0.2 (-0.7, 0.3)             |
| 3 month                                                        | 100 [100, 100]    | 95.1 (12.2) | 505   | 100 [100, 100]        | 95.7 (10.3) | 505   | -0.5 (-1.9, 0.9)             |
| 12 month                                                       | 100 [100, 100]    | 97.1 (9.0)  | 482   | 100 [100, 100]        | 96.5 (10.1) | 485   | 0.6 (-0.6, 1.8)              |
| 24 month                                                       | 100 [100, 100]    | 96.8 (10.7) | 357   | 100 [100, 100]        | 96.1 (10.3) | 352   | 0.6 (-0.9, 2.1)              |
| 36 month                                                       | 100 [100, 100]    | 96.3 (10.9) | 238   | 100 [100, 100]        | 96.7 (9.0)  | 240   | -0.5 (-2.2, 1.2)             |
| Close-out                                                      | 100 [100, 100]    | 96.8 (9.3)  | 353   | 100 [100, 100]        | 96.7 (9.1)  | 359   | 0.0 (-1.3, 1.3)              |
| All follow-up                                                  | 100 [100, 100]    | 96.4 (10.6) | 1935  | 100 [100, 100]        | 96.3 (9.9)  | 1941  | 0.0 (-0.8, 0.9)              |
| <b>SAQ Quality of Life Score</b>                               |                   |             |       |                       |             |       |                              |
| Scale: 0 to100; higher scores indicating greater health status |                   |             |       |                       |             |       |                              |
| Baseline                                                       | 75 [58, 92]       | 74.1 (19.3) | 524   | 83 [67, 92]           | 77.7 (18.5) | 522   | -3.6 (-5.8, -1.3)            |
| 3 month                                                        | 83 [67, 92]       | 80.2 (18.8) | 498   | 83 [75, 92]           | 81.7 (16.9) | 496   | -1.6 (-3.8, 0.6)             |
| 12 month                                                       | 92 [75, 100]      | 84.9 (16.7) | 476   | 92 [75, 100]          | 83.1 (18.1) | 479   | 1.9 (-0.3, 4.1)              |
| 24 month                                                       | 92 [75, 100]      | 85.5 (16.3) | 349   | 92 [75, 100]          | 86.0 (14.7) | 342   | -0.6 (-2.8, 1.6)             |

|  |               |              |             |      |              |             |      |                  |
|--|---------------|--------------|-------------|------|--------------|-------------|------|------------------|
|  | 36 month      | 92 [83, 100] | 86.0 (17.0) | 231  | 92 [83, 100] | 86.7 (16.1) | 233  | -0.1 (-2.9, 2.6) |
|  | Close-out     | 92 [75, 100] | 84.7 (16.6) | 340  | 92 [75, 100] | 84.6 (17.1) | 348  | -0.4 (-2.8, 2.0) |
|  | All follow-up | 92 [75, 100] | 83.9 (17.4) | 1894 | 92 [75, 100] | 84.0 (16.9) | 1898 | -0.2 (-1.8, 1.5) |
|  |               |              |             |      |              |             |      |                  |

**SAQ Treatment Satisfaction**

Scale: 0 to 100; higher scores indicating greater health status

|  |               |               |             |      |               |             |      |                   |
|--|---------------|---------------|-------------|------|---------------|-------------|------|-------------------|
|  | Baseline      | 94 [81, 100]  | 89.4 (13.2) | 504  | 100 [81, 100] | 92.4 (10.6) | 498  | -2.8 (-4.3, -1.3) |
|  | 3 month       | 100 [81, 100] | 91.5 (13.2) | 471  | 100 [88, 100] | 92.1 (11.4) | 479  | -0.6 (-2.2, 0.9)  |
|  | 12 month      | 100 [88, 100] | 92.7 (12.5) | 450  | 100 [81, 100] | 92.2 (11.6) | 465  | 0.4 (-1.2, 1.9)   |
|  | 24 month      | 100 [94, 100] | 93.8 (11.0) | 336  | 100 [88, 100] | 92.8 (11.2) | 337  | 0.9 (-0.7, 2.5)   |
|  | 36 month      | 100 [88, 100] | 92.6 (12.4) | 230  | 100 [88, 100] | 92.5 (13.6) | 231  | 0.7 (-1.6, 3.0)   |
|  | Close-out     | 100 [88, 100] | 93.1 (12.3) | 336  | 100 [88, 100] | 92.8 (11.9) | 347  | 0.3 (-1.4, 2.1)   |
|  | All follow-up | 100 [88, 100] | 92.7 (12.4) | 1823 | 100 [88, 100] | 92.4 (11.8) | 1859 | 0.3 (-0.8, 1.4)   |

Supplement Table 6: Secondary Quality of Life Instruments in the ISCHEMIA Comprehensive QOL Substudy Stratified by Baseline Angina Frequency Score

A) With Baseline Angina Frequency Score of 0 to 80

|                                                                                                                             | Invasive Strategy |             |       | Conservative Strategy |             |       | Adjusted Difference (95% CI) |
|-----------------------------------------------------------------------------------------------------------------------------|-------------------|-------------|-------|-----------------------|-------------|-------|------------------------------|
|                                                                                                                             | Median [q1, q3]   | Mean (SD)   | N 372 | Median [q1, q3]       | Mean (SD)   | N 372 |                              |
| <b>Duke Activity Score Index</b>                                                                                            |                   |             |       |                       |             |       |                              |
| Scale: 0 to 58.2; higher scores denote greater functional capacity                                                          |                   |             |       |                       |             |       |                              |
| Baseline                                                                                                                    | 18 [7, 32]        | 20.3 (15.1) | 228   | 13 [7, 26]            | 18.1 (14.3) | 235   | 2.1 (-0.5, 4.8)              |
| 3 month                                                                                                                     | 22 [11, 36]       | 24.2 (16.5) | 224   | 21 [11, 31]           | 22.0 (14.2) | 219   | 2.0 (-0.8, 4.8)              |
| 12 month                                                                                                                    | 25 [13, 38]       | 26.3 (16.7) | 230   | 21 [9, 37]            | 23.2 (16.3) | 219   | 3.4 (0.4, 6.3)               |
| 24 month                                                                                                                    | 27 [14, 39]       | 27.3 (16.7) | 166   | 24 [12, 37]           | 25.0 (16.2) | 170   | 2.9 (-0.2, 6.1)              |
| 36 month                                                                                                                    | 26 [13, 37]       | 25.8 (16.9) | 114   | 21 [11, 34]           | 23.2 (15.9) | 113   | 2.9 (-0.4, 6.3)              |
| Close-out                                                                                                                   | 25 [13, 43]       | 26.7 (17.2) | 178   | 21 [10, 32]           | 22.6 (15.2) | 180   | 4.7 (1.7, 7.7)               |
| All follow-up                                                                                                               | 25 [13, 38]       | 26.0 (16.8) | 912   | 21 [10, 33]           | 23.2 (15.5) | 901   | 3.2 (0.6, 5.7)               |
| <b>RAND General Health Rating</b>                                                                                           |                   |             |       |                       |             |       |                              |
| Scale: 0 to 100; higher score indicating greater overall health                                                             |                   |             |       |                       |             |       |                              |
| Baseline                                                                                                                    | 50 [25, 50]       | 44.8 (22.1) | 243   | 50 [25, 50]           | 44.8 (21.6) | 248   | 0.0 (-3.9, 3.8)              |
| 3 month                                                                                                                     | 50 [25, 75]       | 52.1 (22.5) | 227   | 50 [25, 50]           | 47.4 (23.4) | 232   | 4.5 (0.3, 8.6)               |
| 12 month                                                                                                                    | 50 [50, 75]       | 55.3 (23.9) | 234   | 50 [25, 75]           | 49.5 (21.3) | 233   | 6.3 (2.2, 10.4)              |
| 24 month                                                                                                                    | 50 [50, 75]       | 56.1 (25.3) | 173   | 50 [25, 75]           | 51.1 (23.1) | 178   | 6.1 (1.3, 10.8)              |
| 36 month                                                                                                                    | 50 [50, 75]       | 55.2 (26.1) | 120   | 50 [25, 75]           | 53.0 (23.4) | 123   | 3.3 (-2.2, 8.8)              |
| Close-out                                                                                                                   | 50 [50, 75]       | 56.1 (24.5) | 190   | 50 [25, 75]           | 51.3 (22.0) | 196   | 5.6 (1.1, 10.1)              |
| All follow-up                                                                                                               | 50 [50, 75]       | 54.8 (24.2) | 944   | 50 [25, 75]           | 50.1 (22.6) | 962   | 5.2 (1.6, 8.7)               |
| <b>Rose Dyspnea Scale</b>                                                                                                   |                   |             |       |                       |             |       |                              |
| Scores range from 0 to 4, where 0 indicates no dyspnea with activity and 4 indicates significant limitations due to dyspnea |                   |             |       |                       |             |       |                              |
| Baseline                                                                                                                    | 1 [0, 3]          | 1.6 (1.4)   | 362   | 1 [1, 3]              | 1.7 (1.4)   | 364   | -0.1 (-0.3, 0.1)             |
| 3 month                                                                                                                     | 0 [0, 2]          | 1.1 (1.4)   | 338   | 1 [0, 2]              | 1.3 (1.4)   | 341   | -0.2 (-0.4, 0)               |
| 12 month                                                                                                                    | 0 [0, 1]          | 0.9 (1.4)   | 336   | 1 [0, 2]              | 1.2 (1.4)   | 320   | -0.3 (-0.5, -0.1)            |
| 24 month                                                                                                                    | 0 [0, 1]          | 1.0 (1.4)   | 249   | 0 [0, 1]              | 1.0 (1.3)   | 237   | 0 (-0.2, 0.3)                |
| 36 month                                                                                                                    | 0 [0, 1]          | 1.0 (1.4)   | 166   | 1 [0, 2]              | 1.2 (1.4)   | 159   | -0.1 (-0.4, 0.2)             |
| Close-out                                                                                                                   | 0 [0, 2]          | 0.9 (1.4)   | 238   | 1 [0, 2]              | 1.2 (1.5)   | 234   | -0.3 (-0.5, 0)               |
| All follow-up                                                                                                               | 0 [0, 1]          | 1.0 (1.4)   | 1327  | 1 [0, 2]              | 1.2 (1.4)   | 1291  | -0.2 (-0.3, 0)               |
| <b>Perceived Stress Scale - 4</b>                                                                                           |                   |             |       |                       |             |       |                              |
| Scale: 0 to 16; higher values denoting greater perceptions of stress                                                        |                   |             |       |                       |             |       |                              |
| Baseline                                                                                                                    | 5 [2, 7]          | 4.5 (3.0)   | 243   | 5 [2, 8]              | 5.1 (3.3)   | 246   | -0.6 (-1.2, -0.1)            |
| 3 month                                                                                                                     | 3 [1, 6]          | 3.8 (3.1)   | 223   | 3 [1, 6]              | 3.8 (3.3)   | 224   | -0.1 (-0.7, 0.5)             |
| 12 month                                                                                                                    | 3 [1, 6]          | 3.7 (3.2)   | 226   | 3 [1, 6]              | 3.6 (3.1)   | 217   | 0.0 (-0.6, 0.6)              |
| 24 month                                                                                                                    | 2 [1, 6]          | 3.5 (3.3)   | 162   | 3 [1, 6]              | 3.6 (3.3)   | 169   | -0.3 (-1.0, 0.4)             |
| 36 month                                                                                                                    | 4 [1, 7]          | 4.2 (3.6)   | 116   | 2 [0, 6]              | 3.3 (3.2)   | 110   | 0.6 (-0.2, 1.4)              |
| Close-out                                                                                                                   | 2 [0, 6]          | 3.2 (3.3)   | 182   | 2 [0, 5]              | 2.8 (2.8)   | 173   | 0.2 (-0.4, 0.8)              |
| All follow-up                                                                                                               | 3 [1, 6]          | 3.7 (3.3)   | 909   | 3 [1, 6]              | 3.5 (3.2)   | 893   | 0.1 (-0.4, 0.6)              |

| <b>Life Orientation Test- Revised Score</b>                             |             |             |      |             |             |      |                   |  |
|-------------------------------------------------------------------------|-------------|-------------|------|-------------|-------------|------|-------------------|--|
| Scale: 0 to 24; higher score indicating greater optimism                |             |             |      |             |             |      |                   |  |
| Baseline                                                                | 17 [14, 21] | 16.8 (5.1)  | 240  | 17 [14, 21] | 16.9 (5.1)  | 235  | -0.1 (-1.0, 0.8)  |  |
| 3 month                                                                 | 19 [15, 23] | 18.1 (5.5)  | 224  | 19 [15, 23] | 18.0 (5.2)  | 227  | 0.1 (-0.9, 1.1)   |  |
| 12 month                                                                | 20 [15, 24] | 18.5 (5.2)  | 228  | 20 [16, 23] | 19.1 (4.7)  | 220  | -0.6 (-1.5, 0.3)  |  |
| 24 month                                                                | 20 [15, 24] | 18.6 (5.2)  | 167  | 19 [15, 23] | 18.6 (5.0)  | 169  | -0.1 (-1.1, 1.0)  |  |
| 36 month                                                                | 19 [14, 24] | 18.0 (5.4)  | 111  | 20 [16, 23] | 19.0 (5.0)  | 113  | -0.8 (-2.0, 0.3)  |  |
| Close-out                                                               | 20 [15, 23] | 18.5 (5.1)  | 177  | 21 [16, 24] | 19.7 (4.3)  | 172  | -1.1 (-2.0, -0.1) |  |
| All follow-up                                                           | 19 [15, 23] | 18.3 (5.3)  | 907  | 20 [15, 23] | 18.8 (4.9)  | 901  | -0.5 (-1.3, 0.3)  |  |
| <b>Patient Health Questionnaire-8</b>                                   |             |             |      |             |             |      |                   |  |
| Scale: 0 to 24; higher scores indicating greater severity of depression |             |             |      |             |             |      |                   |  |
| Baseline                                                                | 3 [1, 7]    | 4.5 (4.8)   | 345  | 4 [1, 8]    | 5.4 (5.4)   | 346  | -0.9 (-1.6, -0.1) |  |
| 3 month                                                                 | 2 [0, 6]    | 4.2 (5.1)   | 320  | 2 [0, 6]    | 3.9 (4.5)   | 313  | 0.2 (-0.6, 0.9)   |  |
| 12 month                                                                | 2 [0, 6]    | 3.9 (4.7)   | 316  | 2 [0, 6]    | 3.9 (4.5)   | 303  | -0.1 (-0.8, 0.6)  |  |
| 24 month                                                                | 2 [0, 5]    | 3.6 (4.5)   | 239  | 2 [0, 6]    | 4.0 (4.7)   | 228  | -0.3 (-1.1, 0.4)  |  |
| 36 month                                                                | 2 [0, 5]    | 3.7 (5.1)   | 164  | 2 [0, 5]    | 3.6 (4.7)   | 154  | -0.2 (-1.0, 0.7)  |  |
| Close-out                                                               | 1 [0, 4]    | 3.2 (4.2)   | 226  | 2 [0, 5]    | 3.5 (4.3)   | 233  | -0.4 (-1.1, 0.3)  |  |
| All follow-up                                                           | 2 [0, 5]    | 3.8 (4.7)   | 1265 | 2 [0, 6]    | 3.8 (4.5)   | 1231 | -0.2 (-0.8, 0.4)  |  |
| <b>EQ-5D-VAS</b>                                                        |             |             |      |             |             |      |                   |  |
| Scale: 0 to 100; higher scores denote better self-reported health state |             |             |      |             |             |      |                   |  |
| Baseline                                                                | 70 [55, 80] | 67.6 (16.7) | 364  | 70 [50, 80] | 66.1 (18.5) | 366  | 1.5 (-1.0, 4.1)   |  |
| 3 month                                                                 | 75 [60, 85] | 73.0 (17.6) | 343  | 75 [65, 84] | 72.1 (17.4) | 344  | 1.0 (-1.6, 3.6)   |  |
| 12 month                                                                | 80 [67, 87] | 73.9 (18.5) | 342  | 80 [65, 85] | 73.4 (18.0) | 332  | 0.6 (-2.1, 3.3)   |  |
| 24 month                                                                | 80 [70, 90] | 75.8 (17.3) | 243  | 80 [70, 90] | 74.6 (18.1) | 242  | 1.2 (-1.8, 4.1)   |  |
| 36 month                                                                | 80 [70, 90] | 75.4 (18.0) | 167  | 80 [63, 85] | 73.7 (17.1) | 164  | 1.6 (-1.6, 4.8)   |  |
| Close-out                                                               | 80 [70, 90] | 76.4 (17.7) | 245  | 75 [65, 85] | 73.7 (16.0) | 251  | 2.2 (-0.6, 5.1)   |  |
| All follow-up                                                           | 80 [68, 90] | 74.6 (17.9) | 1340 | 75 [65, 85] | 73.4 (17.4) | 1333 | 1.3 (-0.9, 3.5)   |  |

B) With Baseline Angina Frequency Score of 81 to 100

| Timepoint                                                          | Invasive Strategy |             |       | Conservative Strategy |             |       | Adjusted Difference (95% CI) |
|--------------------------------------------------------------------|-------------------|-------------|-------|-----------------------|-------------|-------|------------------------------|
|                                                                    | Median [q1 q3]    | Mean (SD)   | N 533 | Median [q1 q3]        | Mean (SD)   | N 538 |                              |
| <b>Duke Activity Score Index</b>                                   |                   |             |       |                       |             |       |                              |
| Scale: 0 to 58.2; higher scores denote greater functional capacity |                   |             |       |                       |             |       |                              |
| Baseline                                                           | 27 [13, 39]       | 28.1 (16.7) | 328   | 30 [17, 43]           | 30.0 (16.2) | 333   | -2.2 (-4.6, 0.3)             |
| 3 month                                                            | 23 [13, 37]       | 26.7 (16.0) | 323   | 30 [18, 40]           | 29.6 (15.4) | 322   | -3.6 (-5.9, -1.2)            |
| 12 month                                                           | 28 [13, 43]       | 28.7 (16.5) | 306   | 31 [18, 43]           | 30.4 (15.9) | 317   | -1.8 (-4.3, 0.6)             |
| 24 month                                                           | 27 [16, 42]       | 28.3 (16.3) | 241   | 31 [15, 40]           | 29.4 (16.1) | 241   | -1.6 (-4.2, 0.9)             |
| 36 month                                                           | 27 [13, 38]       | 26.9 (16.7) | 163   | 29 [16, 43]           | 28.7 (16.6) | 176   | -1.7 (-4.6, 1.2)             |
| Close-out                                                          | 27 [13, 41]       | 27.3 (16.3) | 254   | 29 [16, 41]           | 28.7 (15.7) | 263   | -1.1 (-3.7, 1.4)             |
| All follow-up                                                      | 27 [13, 39]       | 27.6 (16.3) | 1287  | 30 [16, 43]           | 29.4 (15.9) | 1319  | -2.0 (-4.1, 0.1)             |
| <b>RAND General Health Rating</b>                                  |                   |             |       |                       |             |       |                              |
| Scale: 0 to 100; higher score indicating greater overall health    |                   |             |       |                       |             |       |                              |
| Baseline                                                           | 50 [50, 75]       | 52.1 (21.7) | 348   | 50 [50, 75]           | 56.2 (21.9) | 346   | -4.0 (-7.2, -0.7)            |



|  |               |             |             |      |             |             |      |                  |
|--|---------------|-------------|-------------|------|-------------|-------------|------|------------------|
|  | 3 month       | 50 [50, 75] | 55.9 (22.9) | 337  | 50 [50, 75] | 57.6 (21.0) | 331  | -1.9 (-5.2, 1.3) |
|  | 12 month      | 50 [50, 75] | 58.0 (24.0) | 319  | 50 [50, 75] | 58.6 (22.1) | 329  | -1.1 (-4.6, 2.3) |
|  | 24 month      | 50 [50, 75] | 57.8 (23.1) | 259  | 50 [50, 75] | 58.0 (22.4) | 251  | -0.9 (-4.6, 2.8) |
|  | 36 month      | 50 [50, 75] | 56.1 (23.6) | 173  | 50 [50, 75] | 57.6 (22.4) | 188  | -3.2 (-7.5, 1.0) |
|  | Close-out     | 50 [50, 75] | 57.8 (24.1) | 272  | 50 [50, 75] | 56.6 (23.3) | 283  | 1.1 (-2.7, 4.8)  |
|  | All follow-up | 50 [50, 75] | 57.2 (23.5) | 1360 | 50 [50, 75] | 57.7 (22.2) | 1382 | -1.2 (-4.0, 1.6) |

#### Rose Dyspnea Scale

Scores range from 0 to 4, where 0 indicates no dyspnea with activity and 4 indicates significant limitations due to dyspnea

|  |               |          |           |      |          |           |      |                 |
|--|---------------|----------|-----------|------|----------|-----------|------|-----------------|
|  | Baseline      | 0 [0, 1] | 0.8 (1.2) | 524  | 0 [0, 1] | 0.8 (1.1) | 528  | 0 (-0.1, 0.2)   |
|  | 3 month       | 0 [0, 1] | 0.7 (1.2) | 480  | 0 [0, 1] | 0.7 (1.1) | 490  | 0 (-0.1, 0.1)   |
|  | 12 month      | 0 [0, 1] | 0.6 (1.2) | 470  | 0 [0, 1] | 0.6 (1.1) | 471  | 0 (-0.1, 0.1)   |
|  | 24 month      | 0 [0, 1] | 0.7 (1.2) | 343  | 0 [0, 1] | 0.6 (1.1) | 337  | 0.1 (-0.1, 0.2) |
|  | 36 month      | 0 [0, 1] | 0.7 (1.2) | 230  | 0 [0, 1] | 0.7 (1.2) | 231  | 0 (-0.2, 0.2)   |
|  | Close-out     | 0 [0, 1] | 0.7 (1.2) | 339  | 0 [0, 1] | 0.8 (1.2) | 344  | 0 (-0.2, 0.1)   |
|  | All follow-up | 0 [0, 1] | 0.7 (1.2) | 1862 | 0 [0, 1] | 0.7 (1.1) | 1873 | 0 (-0.1, 0.1)   |

#### Perceived Stress Scale - 4

Scale: 0 to 16; higher values denoting greater perceptions of stress

|  |               |          |           |      |          |           |      |                 |
|--|---------------|----------|-----------|------|----------|-----------|------|-----------------|
|  | Baseline      | 4 [1, 6] | 4.0 (3.0) | 346  | 4 [1, 6] | 3.9 (3.1) | 346  | 0.0 (-0.5, 0.5) |
|  | 3 month       | 2 [0, 5] | 3.2 (3.1) | 314  | 2 [0, 5] | 2.8 (2.9) | 324  | 0.3 (-0.1, 0.8) |
|  | 12 month      | 2 [0, 5] | 3.2 (3.2) | 311  | 2 [0, 5] | 3.0 (3.2) | 317  | 0.2 (-0.3, 0.7) |
|  | 24 month      | 3 [1, 6] | 3.4 (3.1) | 241  | 2 [0, 6] | 3.2 (3.1) | 239  | 0.2 (-0.3, 0.8) |
|  | 36 month      | 3 [1, 6] | 3.4 (3.0) | 165  | 2 [0, 5] | 2.8 (3.0) | 180  | 0.6 (0.0, 1.2)  |
|  | Close-out     | 2 [0, 6] | 3.0 (3.1) | 255  | 1 [0, 5] | 2.6 (3.1) | 265  | 0.4 (-0.1, 0.9) |
|  | All follow-up | 2 [0, 5] | 3.2 (3.1) | 1286 | 2 [0, 5] | 2.9 (3.1) | 1325 | 0.4 (0.0, 0.7)  |

#### Life Orientation Test- Revised Score

Scale: 0 to 24; higher score indicating greater optimism

|  |               |             |            |      |             |            |      |                  |
|--|---------------|-------------|------------|------|-------------|------------|------|------------------|
|  | Baseline      | 18 [14, 22] | 17.8 (4.7) | 340  | 18 [14, 22] | 17.7 (4.9) | 335  | 0.3 (-0.4, 1.0)  |
|  | 3 month       | 20 [15, 23] | 18.5 (5.1) | 313  | 20 [15, 23] | 18.7 (4.6) | 320  | -0.1 (-0.8, 0.7) |
|  | 12 month      | 20 [16, 23] | 18.7 (5.0) | 310  | 20 [16, 23] | 19.2 (4.5) | 311  | -0.7 (-1.4, 0.0) |
|  | 24 month      | 20 [15, 23] | 18.6 (4.7) | 240  | 20 [15, 24] | 18.6 (5.3) | 235  | -0.1 (-0.9, 0.7) |
|  | 36 month      | 20 [15, 24] | 18.9 (4.8) | 163  | 21 [16, 24] | 19.3 (5.5) | 173  | -0.1 (-1.1, 0.8) |
|  | Close-out     | 20 [16, 24] | 19.3 (4.8) | 248  | 21 [16, 23] | 19.1 (4.9) | 260  | 0.2 (-0.6, 0.9)  |
|  | All follow-up | 20 [16, 23] | 18.8 (4.9) | 1274 | 20 [16, 24] | 19.0 (4.9) | 1299 | -0.2 (-0.8, 0.4) |

#### Patient Health Questionnaire-8

Scale: 0 to 24; higher scores indicating greater severity of depression

|  |               |          |           |      |          |           |      |                 |
|--|---------------|----------|-----------|------|----------|-----------|------|-----------------|
|  | Baseline      | 2 [0, 5] | 3.5 (4.2) | 500  | 2 [0, 4] | 3.1 (3.8) | 494  | 0.3 (-0.2, 0.8) |
|  | 3 month       | 1 [0, 4] | 2.9 (4.1) | 455  | 1 [0, 4] | 2.7 (3.4) | 463  | 0.2 (-0.3, 0.7) |
|  | 12 month      | 1 [0, 4] | 2.7 (3.8) | 446  | 1 [0, 4] | 2.6 (3.9) | 452  | 0.1 (-0.4, 0.6) |
|  | 24 month      | 1 [0, 4] | 2.8 (3.7) | 325  | 1 [0, 4] | 2.9 (3.9) | 329  | 0.0 (-0.5, 0.5) |
|  | 36 month      | 1 [0, 5] | 2.9 (4.0) | 222  | 1 [0, 3] | 2.8 (4.2) | 230  | 0.2 (-0.4, 0.8) |
|  | Close-out     | 1 [0, 4] | 2.7 (3.9) | 327  | 1 [0, 3] | 2.5 (3.8) | 337  | 0.3 (-0.3, 0.8) |
|  | All follow-up | 1 [0, 4] | 2.8 (3.9) | 1775 | 1 [0, 4] | 2.7 (3.8) | 1811 | 0.2 (-0.2, 0.6) |

#### EQ-5D-VAS

Scale: 0 to 100; higher scores denote better self-reported health state

|  |          |             |             |     |             |             |     |                  |
|--|----------|-------------|-------------|-----|-------------|-------------|-----|------------------|
|  | Baseline | 75 [65, 85] | 74.0 (16.0) | 523 | 80 [70, 85] | 75.8 (15.0) | 527 | -1.8 (-3.6, 0.1) |
|  | 3 month  | 80 [70, 90] | 76.0 (16.6) | 494 | 80 [70, 90] | 77.4 (14.4) | 492 | -1.7 (-3.6, 0.2) |
|  | 12 month | 80 [70, 90] | 76.9 (16.2) | 472 | 80 [75, 90] | 78.3 (15.6) | 469 | -1.4 (-3.4, 0.6) |

|               |             |             |      |             |             |      |                  |
|---------------|-------------|-------------|------|-------------|-------------|------|------------------|
| 24 month      | 80 [70, 90] | 77.2 (16.7) | 349  | 80 [74, 90] | 79.0 (14.4) | 343  | -1.4 (-3.5, 0.7) |
| 36 month      | 80 [70, 90] | 78.4 (15.8) | 232  | 80 [70, 90] | 77.9 (16.4) | 237  | 0.5 (-2.0, 3.1)  |
| Close-out     | 80 [70, 90] | 77.3 (16.2) | 341  | 80 [70, 90] | 77.3 (15.3) | 353  | -0.1 (-2.3, 2.1) |
| All follow-up | 80 [70, 90] | 77.0 (16.3) | 1888 | 80 [70, 90] | 77.9 (15.1) | 1894 | -0.8 (-2.4, 0.8) |
|               |             |             |      |             |             |      |                  |

Supplement Figure 1: Treatment Differences in EQ-5D Visual Analog Scale Outcomes in the ISCHEMIA Comprehensive QOL Substudy

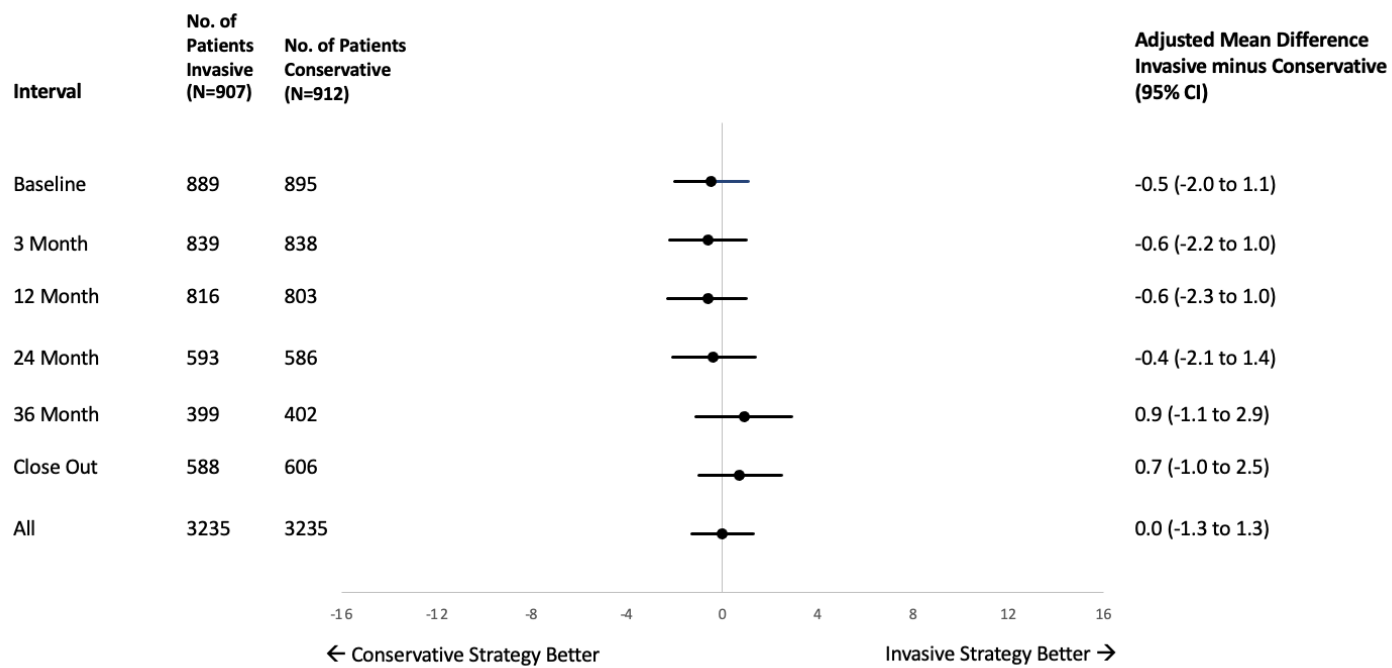



Supplement Figure 3: Treatment Differences in DASI Outcomes in the ISCHEMIA Comprehensive QOL Substudy, North America

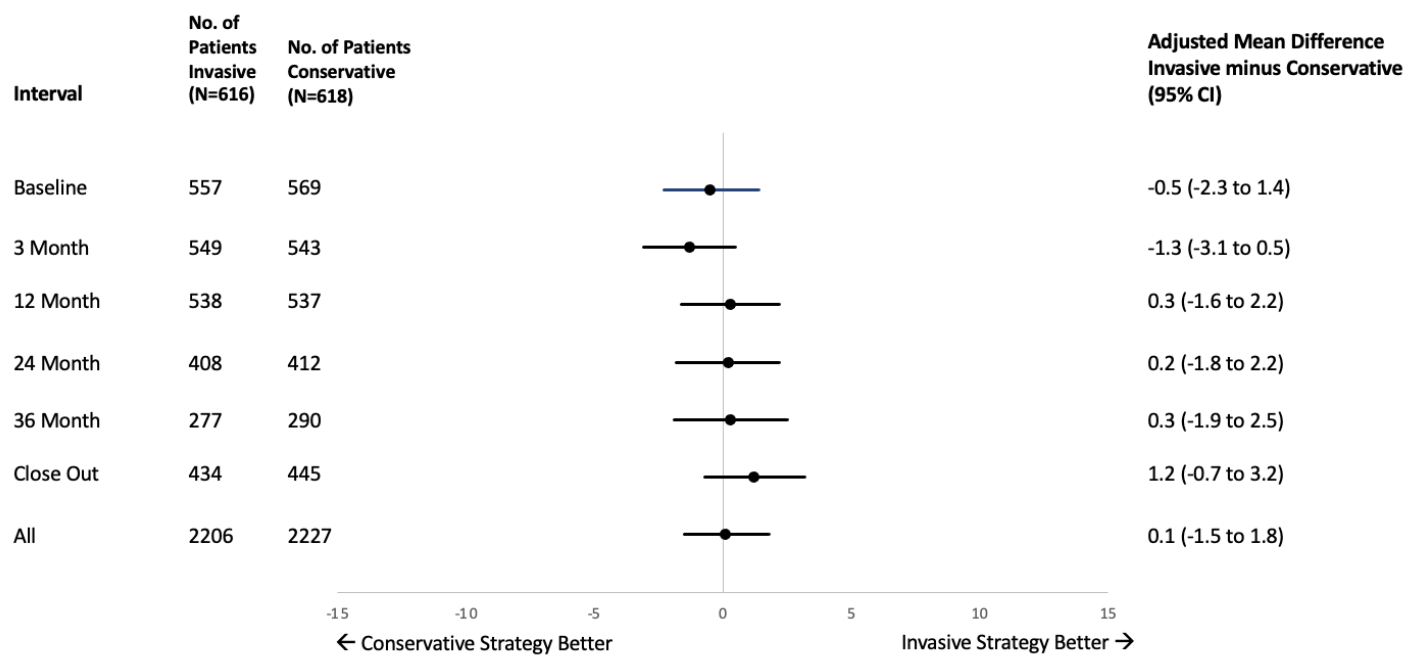





Supplement Figure 6: 12-Month Improvement in Seattle Angina Summary Scores in Patients with Mild, Moderate, and Severe QOL Impairment at Baseline

A. Mild QOL Impairment at Baseline (SAQ Summary Score 81-100)

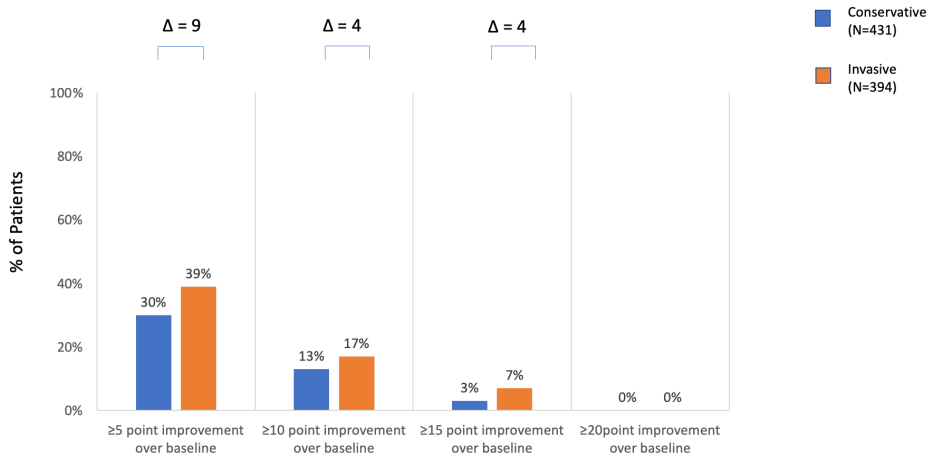

B. Moderate QOL Impairment at Baseline (SAQ Summary Score 61-80)

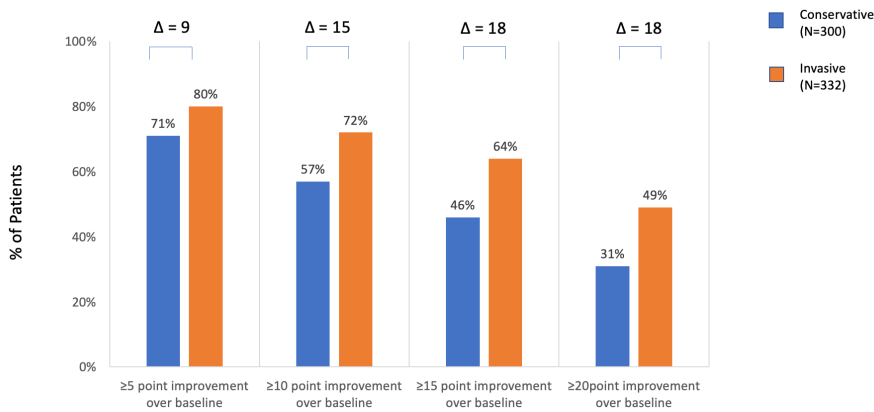

C. Severe QOL Impairment at Baseline (SAQ Summary Score ≤60)

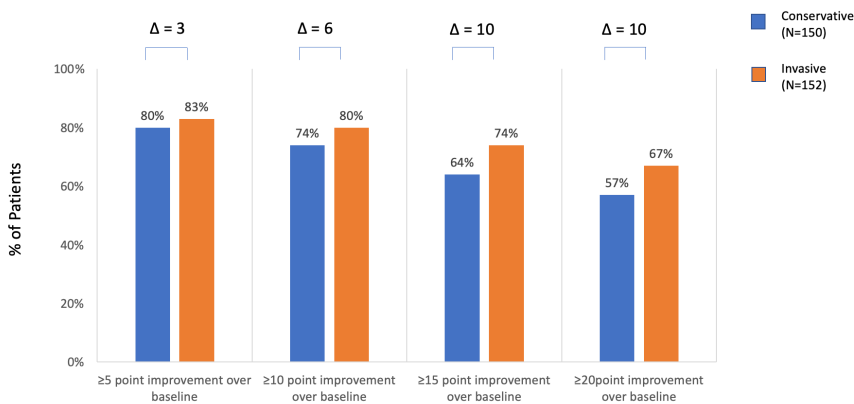



Supplement Figure 7: 12-Month Improvement in SAQ Angina Frequency Scores in Patients with Mild, Moderate, and Severe Limitations at Baseline

A. Mild Angina Frequency at Baseline (SAQ AF Score 81-100)

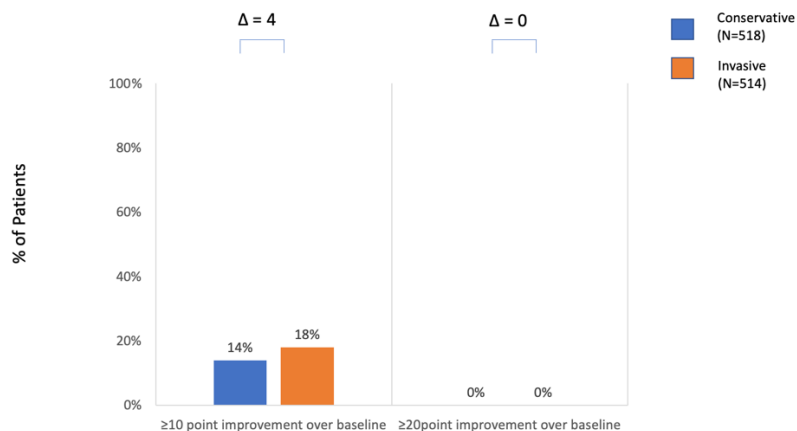

B. Moderate Angina Frequency at Baseline (SAQ AF Score 61-80)

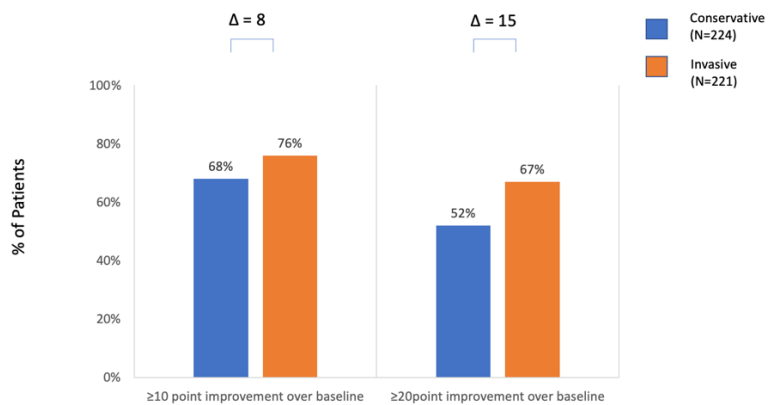

C. Severe Angina Frequency at Baseline (SAQ AF Score ≤60)

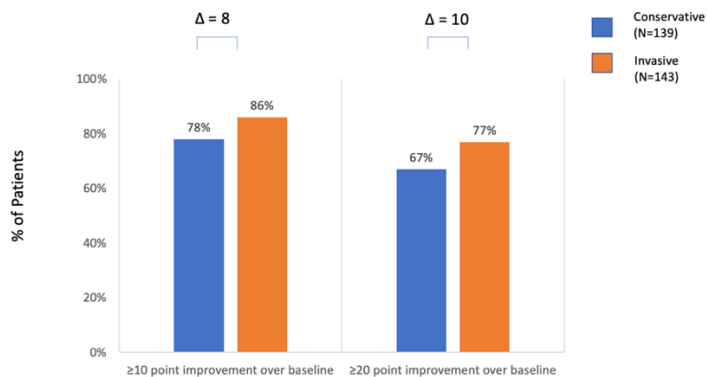

Supplement Figure 8: 12-Month Improvement in Duke Activity Status Index Scores in Patients with Mild, Moderate, and Severe Limitations at Baseline

A. Mild Physical Limitations at Baseline (DASI 31.5 to 58.2)

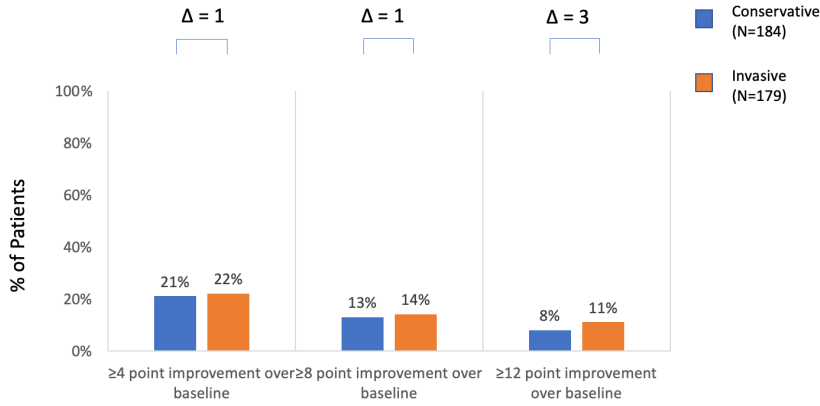

B. Moderate Physical Limitations at Baseline (DASI 13.5 to 31.4)

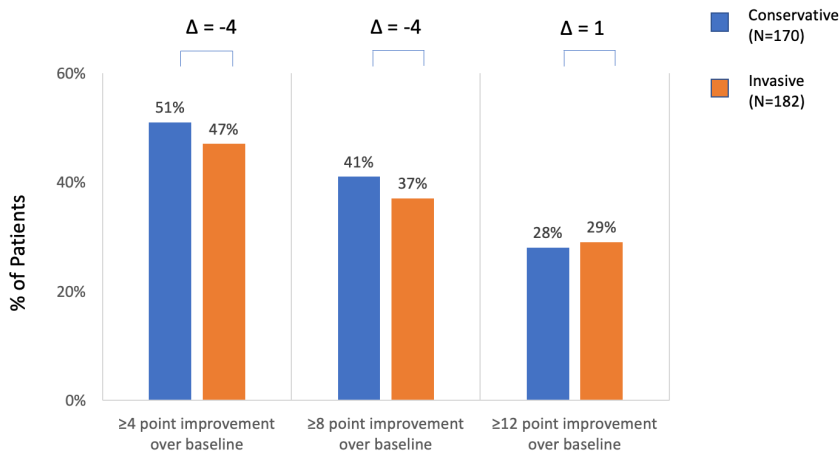

C. Severe Physical Limitations at Baseline (DASI 0 to 13.4)

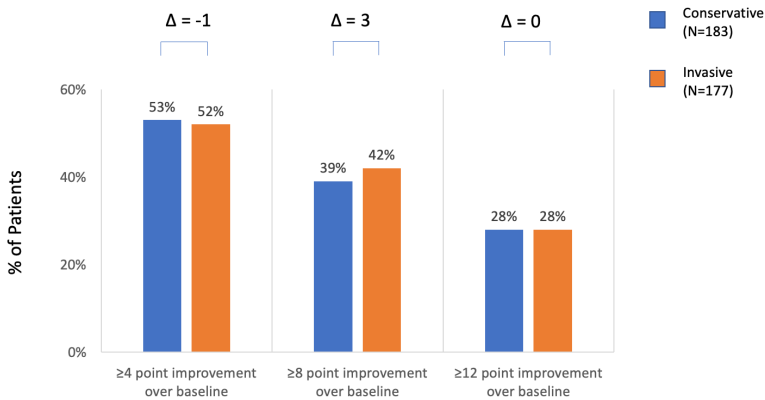

Supplement: NIHMS1790414-supplement-Supplemental_Publication_Material.pdf [file NIHMS1790414-supplement-Supplemental_Publication_Material.pdf]
